# Supplementary material
Source: PubMed Central journal article supplement (PMC4169966)
Supplement: pnas.201403708SI.pdf [file pnas.201403708SI.pdf]

# Supporting Information

Awai et al. 10.1073/pnas.1403708111

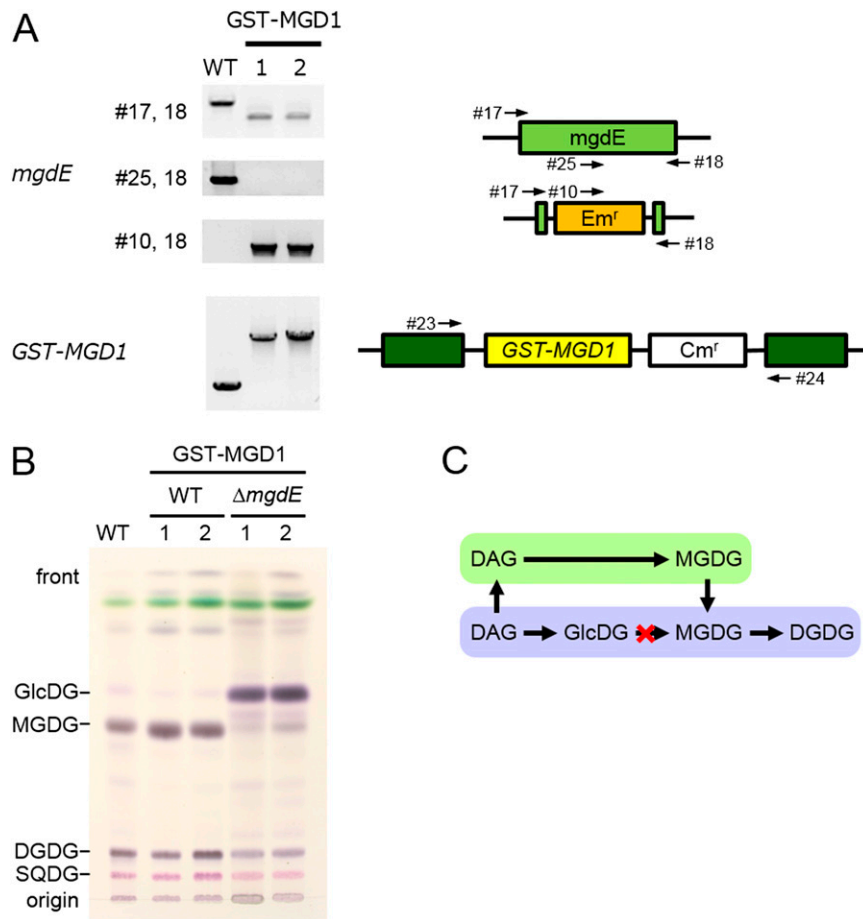

**Fig. S1.** Disruption of the gene for the glucolipid epimerase (*mgdE*) in the monogalactosyldiacylglycerol (MGDG) synthase gene 1 (*MGD1*) background. (A) The genomic *mgdE* region and *GST-MGD1* inserted in the neutral site of the *Synechocystis* sp. PCC 6803 genome (shown schematically at the right) were amplified from the wild-type and  $\Delta mgdE$  strains by PCR with the indicated primer pairs (numbers and arrows) and were separated by agarose gel electrophoresis. (B) TLC analysis of lipids in the wild-type and  $\Delta mgdE$  cells of *Synechocystis* sp. PCC 6803 expressing *GST-MGD1*. (C) Galactolipid synthetic pathways of the  $\Delta mgdE$  in the *MGD1* background. DAG, diacylglycerol.

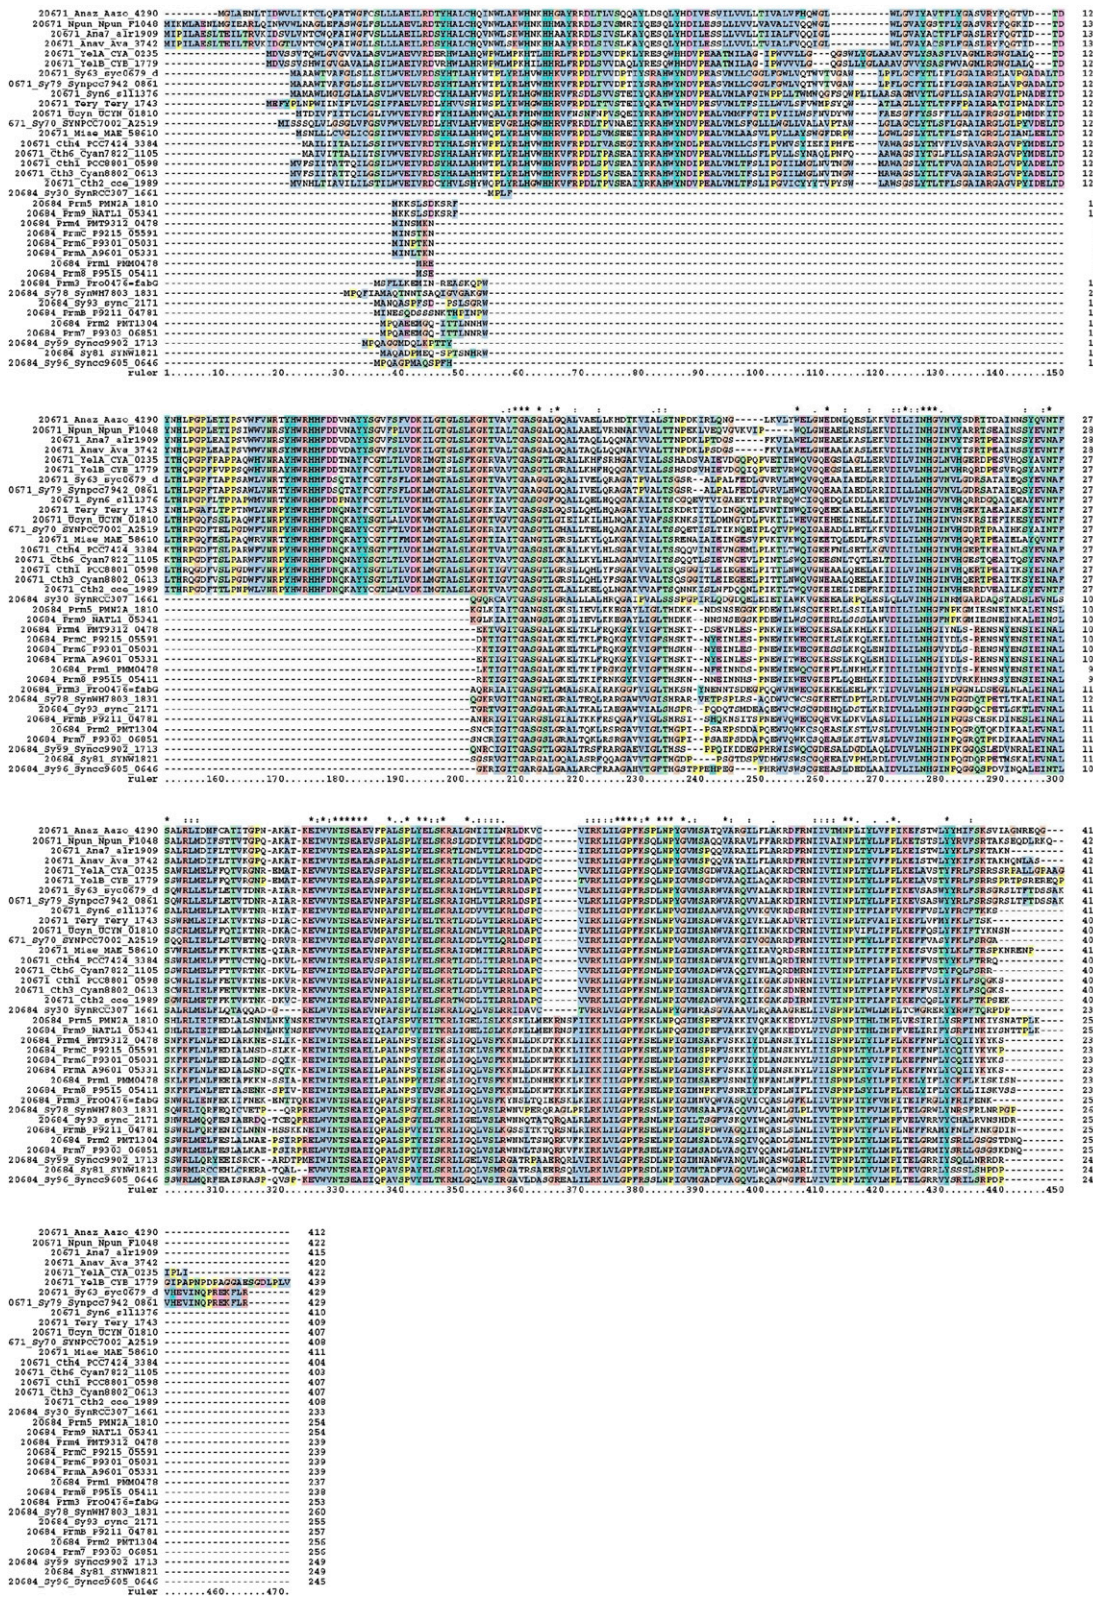

**Fig. S2.** Alignment of MdgE proteins. Translated amino acid sequence alignment of *mgdE* orthologs from 36 cyanobacteria strains (from top to bottom): *Nostoc azollae* strain 0708; *Nostoc punctiforme* PCC 73102; *Anabaena* PCC 7120; *Anabaena variabilis* ATCC 29413; *Synechococcus* sp. JA-3-3Ab; *Synechococcus* sp. JA-2-3B'a(2-13); *Synechococcus elongatus* PCC 6301; *Synechococcus elongatus* PCC 7942; *Synechocystis* sp. PCC 6803; *Trichodesmium erythraeum* IM5101; *Cyanobacterium* UCYN-A; *Synechococcus* sp. PCC 7002; *Microcystis aeruginosa* NIES-843; *Cyanothece* sp. PCC 7424; *Cyanothece* sp. PCC 7822; *Cyanothece* sp. PCC 8801; *Cyanothece* sp. PCC 8802; *Cyanothece* sp. ATCC 5142; *Synechococcus* sp. RCC307; *Prochlorococcus marinus* str. NATL2A; *P. marinus* str. NATL1A; *P. marinus* str. MIT 9312; *P. marinus* str. MIT 9215; *P. marinus* str. MIT 9301; *P. marinus* str. *P. marinus* str. AS9601; *P. marinus* subsp. *pastorisi* str. CCMP1986; *P. marinus* str. MIT 9515; *P. marinus* str. CCMP1375; *Synechococcus* sp. WH 7803; *Synechococcus* sp. CC9311; *P. marinus* str. MIT 9211; *P. marinus* str. MIT 9313; *P. marinus* str. MIT 9303; *Synechococcus* sp. CC9902; *Synechococcus* sp. WH8102; *Synechococcus* sp. CC9605. The different amino acid types are color-coded.

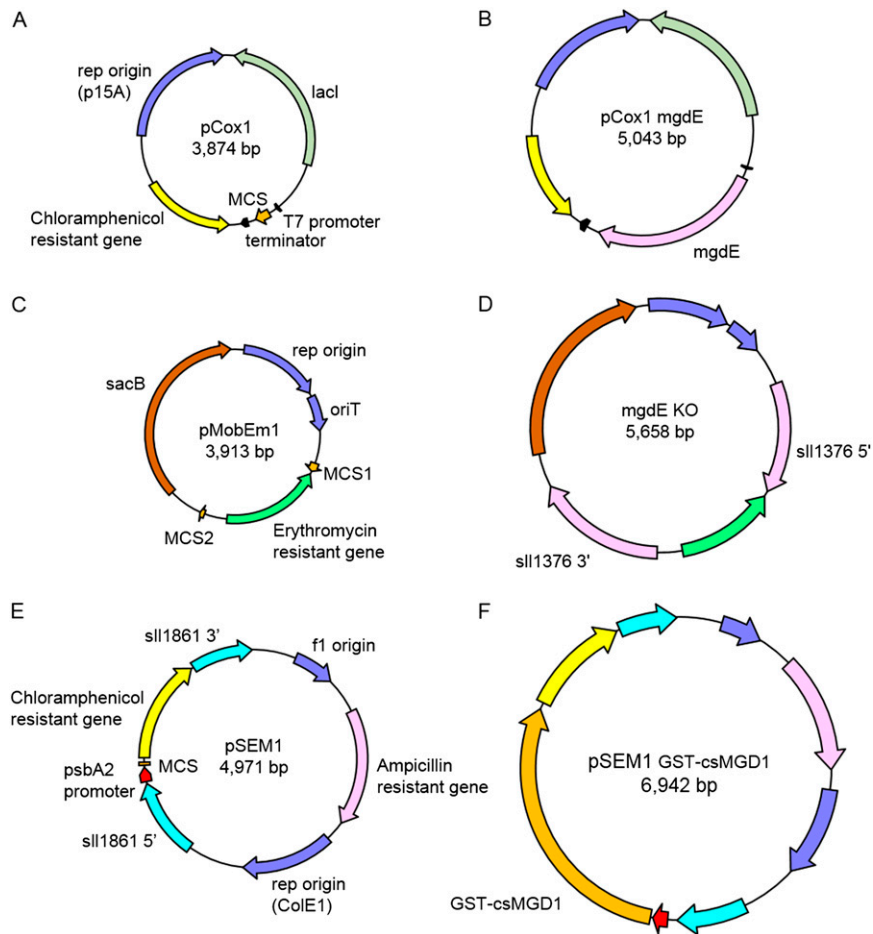

**Fig. S3.** DNA constructs for transformation of *Escherichia coli* and *Synechocystis* cells. (A) *E. coli* coexpression vector pCox1. The chloramphenicol-resistance gene and replication origin (p15A) were amplified from pACYC184, and the *lacI* gene, LacI-repressible T7 promoter, and terminator were from pET24a. (B) *mgdE* of *Synechocystis* sp. PCC 6803 (*sll1376*) was inserted into the *Sma*I site of pCox1 to make pCox1-*mgdE*. (C) Transformation vector pMobEm1. The *sacB* was from pK18mobSacB, the replication origin (*oriV*), transfer origin (*oriT*), and erythromycin-resistance gene were from pRL271, and multiple cloning sites (MCS) were from pBluscriptII SK+. (D) The 5' region of *mgdE* (*sll1376*) was inserted in MCS1, and the 3' region was inserted in MCS2 of pMobEm1 for the *mgdE* knockout vector. (E) *Synechocystis* expression vector pSEM1. (F) For expression of the plant-type MGDG synthase gene in *Synechocystis*, GST-fused cucumber *MGD1* (*CsMGD1*) was inserted downstream of the light-inducible *psbA* promoter in pSEM1.



**Table S1. Synteny of *mgdA* and *mgdE***

| Strain                                                              | <i>melB</i>      | <i>mgdE</i>      | <i>DUF95</i> | <i>mgdA</i>      |
|---------------------------------------------------------------------|------------------|------------------|--------------|------------------|
| <i>Synechocystis</i> sp. PCC 6803                                   | sl11374          | sl11376          | slr1478      | sl11377          |
| <i>Synechococcus</i> sp. WH8102                                     | SYNW0583         | SYNW1821         |              | SYNW0060         |
| <i>Synechococcus elongatus</i> PCC 6301                             | syc0951_d        | syc0679_d        |              | syc0466_c        |
| <i>Synechococcus elongatus</i> PCC 7942                             | Synpcc7942_0571  | Synpcc7942_0861  |              | Synpcc7942_1083  |
| <i>Synechococcus</i> sp. CC9605                                     | Syncc9605_2095   | Syncc9605_0646   |              | Syncc9605_0060   |
| <i>Synechococcus</i> sp. CC9902                                     | Syncc9902_0576   | Syncc9902_1713   |              | Syncc9902_0057   |
| <i>Synechococcus</i> sp. CC9311                                     | sync_2195        | sync_2171        |              | sync_0061        |
| <i>Synechococcus</i> sp. RCC307                                     | SynRCC307_0478   | SynRCC307_1661   |              | SynRCC307_0062   |
| <i>Synechococcus</i> sp. WH 7803                                    | SynWH7803_1931   | SynWH7803_1831   |              | SynWH7803_0061   |
|                                                                     | SynWH7803_1136   |                  |              |                  |
| <i>Synechococcus</i> sp. PCC 7002                                   | SYNPCC7002_A2845 | SYNPCC7002_A2519 |              | SYNPCC7002_A0533 |
|                                                                     | SYNPCC7002_A0460 |                  |              |                  |
| <i>Synechococcus</i> sp. JA-3-3Ab                                   | CYA_2141         | CYA_0235         |              | CYA_0245         |
| <i>Synechococcus</i> sp. JA-2-3B'a(2-13)                            | CYB_0528         | CYB_1779         |              | CYB_1788         |
| <i>Thermosynechococcus elongatus</i> BP 1                           | tlr1521          |                  | tlr1058      | tlr1854          |
| <i>Microcystis aeruginosa</i> NIES-843                              | MAE_37730        | MAE_58610        |              | MAE_58600        |
| <i>Cyanothece</i> sp. PCC 8801                                      | PCC8801_4415     | PCC8801_0598     |              | PCC8801_0599     |
|                                                                     | PCC8801_2906     |                  |              |                  |
| <i>Cyanothece</i> sp. ATCC 51142                                    | cce_1874         | cce_1989         |              | cce_3237         |
|                                                                     | cce_2499         |                  |              |                  |
| <i>Cyanothece</i> sp. PCC 8802                                      | Cyan8802_3190    | Cyan8802_0613    |              | Cyan8802_0614    |
|                                                                     | Cyan8802_4479    |                  |              |                  |
| <i>Cyanothece</i> sp. PCC 7424                                      | PCC7424_0200     | PCC7424_3384     |              | PCC7424_4425     |
|                                                                     | PCC7424_3387     |                  |              |                  |
| <i>Cyanothece</i> sp. PCC 7822                                      | Cyan7822_2100    | Cyan7822_1105    |              | Cyan7822_1106    |
|                                                                     | Cyan7822_1101    |                  |              |                  |
|                                                                     | Cyan7822_5851    |                  |              |                  |
| <i>Cyanobacterium</i> UCYN-A                                        |                  | UCYN_01810       |              |                  |
| <i>Gloeobacter violaceus</i> PCC 7421                               | gll4250          |                  |              | glr2559          |
|                                                                     | glr3959          |                  |              |                  |
| <i>Anabaena</i> sp. PCC 7120                                        | alr3705          | alr1909          | alr1808      | all4933          |
| <i>Nostoc punctiforme</i> PCC 73102                                 | Npun_F1762       | Npun_F1048       | Npun_R4113   | Npun_R4124       |
|                                                                     |                  |                  |              | Npun_R4706       |
| <i>Anabaena variabilis</i> ATCC 29413                               | Ava_3583         | Ava_3742         | Ava_4811     | Ava_2217         |
| <i>Nostoc azollae</i> str. 0708                                     |                  | Aazo_4290        |              | Aazo_3301        |
| <i>Prochlorococcus marinus</i> subsp. <i>pastoris</i> str. CCMP1986 | PMM1323          | PMM0478          |              | PMM1659          |
| <i>Prochlorococcus marinus</i> str. MIT 9313                        | PMT1398          | PMT1304          |              | PMT0058          |
| <i>Prochlorococcus marinus</i> str. CCMP1375                        | Pro1404          | Pro0476          |              | Pro1819          |
| <i>Prochlorococcus marinus</i> str. MIT 9312                        | PMT9312_1421     | PMT9312_0478     |              | PMT9312_1751     |
| <i>Prochlorococcus marinus</i> str. NATL2A                          | PMN2A_0894       | PMN2A_1810       |              | PMN2A_1257       |
| <i>Prochlorococcus marinus</i> str. MIT 9301                        | P9301_15091      | P9301_05031      |              | P9301_18491      |
| <i>Prochlorococcus marinus</i> str. MIT 9303                        | P9303_05681      | P9303_06851      |              | P9303_00631      |
| <i>Prochlorococcus marinus</i> str. MIT 9515                        | P9515_14841      | P9515_05411      |              | P9515_18491      |
| <i>Prochlorococcus marinus</i> str. NATL1A                          | NATL1_17501      | NATL1_05341      |              | NATL1_21281      |
| <i>Prochlorococcus marinus</i> str. AS9601                          | A9601_15231      | A9601_05331      |              | A9601_18681      |
| <i>Prochlorococcus marinus</i> str. MIT 9211                        | P9211_13771      | P9211_04781      |              | P9211_17851      |
| <i>Prochlorococcus marinus</i> str. MIT 9215                        | P9215_15521      | P9215_05591      |              | P9215_19321      |
| <i>Trichodesmium erythraeum</i> IMS101                              | Tery_3858        | Tery_1743        |              | Tery_2749        |
|                                                                     | Tery_2105        |                  |              |                  |
| <i>Acaryochloris marina</i> MBIC11017                               | AM1_3342         |                  | AM1_3172     | AM1_4576         |

The genes *melB*, *mgdE*, *DUF95*, and *mgdA* are aligned as a gene cluster in the genome of *Synechocystis* sp. PCC 6803. Orthologs of these genes in various cyanobacterial genomes are listed. The orthologs that are present at the same positions of the corresponding genes in the gene cluster of *Synechocystis* sp. PCC 6803 are highlighted in green. A blank column indicates there is no significant ortholog in the corresponding genomes. Pink highlighting indicates that *Thermosynechococcus elongatus* BP 1, *Gloeobacter violaceus* PCC 7421, and *Acaryochloris marina* MBIC11017 do not have significant orthologs of *mgdE*, even though these bacteria have orthologs of *mgdA*.
